# Supplementary material for: AKR-001, an Fc-FGF21 Analog, Showed Sustained Pharmacodynamic Effects on Insulin Sensitivity and Lipid Metabolism in Type 2 Diabetes Patients
Source: PubMed Central journal article supplement — Cell Rep Med. 2020 Jul 21;1(4):100057. doi: 10.1016/j.xcrm.2020.100057 (PMC7659583; doi:10.1016/j.xcrm.2020.100057), 2020-07-21
Supplement: mmc1.pdf [file mmc1.pdf]

**Cell Reports Medicine, Volume 1**

**Supplemental Information**

**AKR-001, an Fc-FGF21 Analog, Showed Sustained  
Pharmacodynamic Effects on Insulin Sensitivity  
and Lipid Metabolism in Type 2 Diabetes Patients**

**Allegra Kaufman, Lubna Abuqayyas, William S. Denney, Erik J. Tillman, and Tim Rolph**

## **Supplemental Information**

AKR-001, an Fc-FGF21 analog, demonstrated sustained pharmacodynamic effects on insulin sensitivity and lipid metabolism in type 2 diabetes patients

Allegra Kaufman, Lubna Abuqayyas, William S Denney, Erik J Tillman, and Tim Rolph

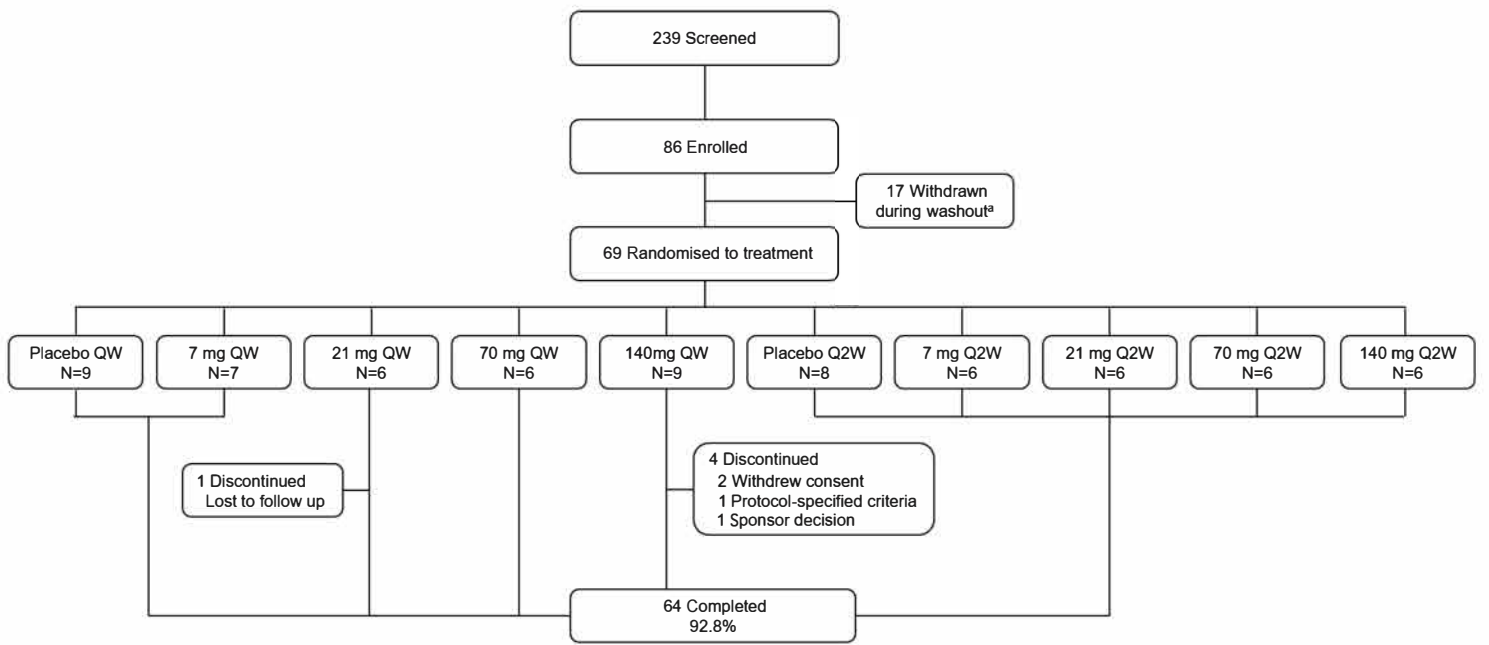

\*Protocol-specified instructions to withdraw subjects who did not tolerate withdrawal of type 2 diabetes medications

Figure S1. Clinical Study Flow Diagram. Related to Figure 1.

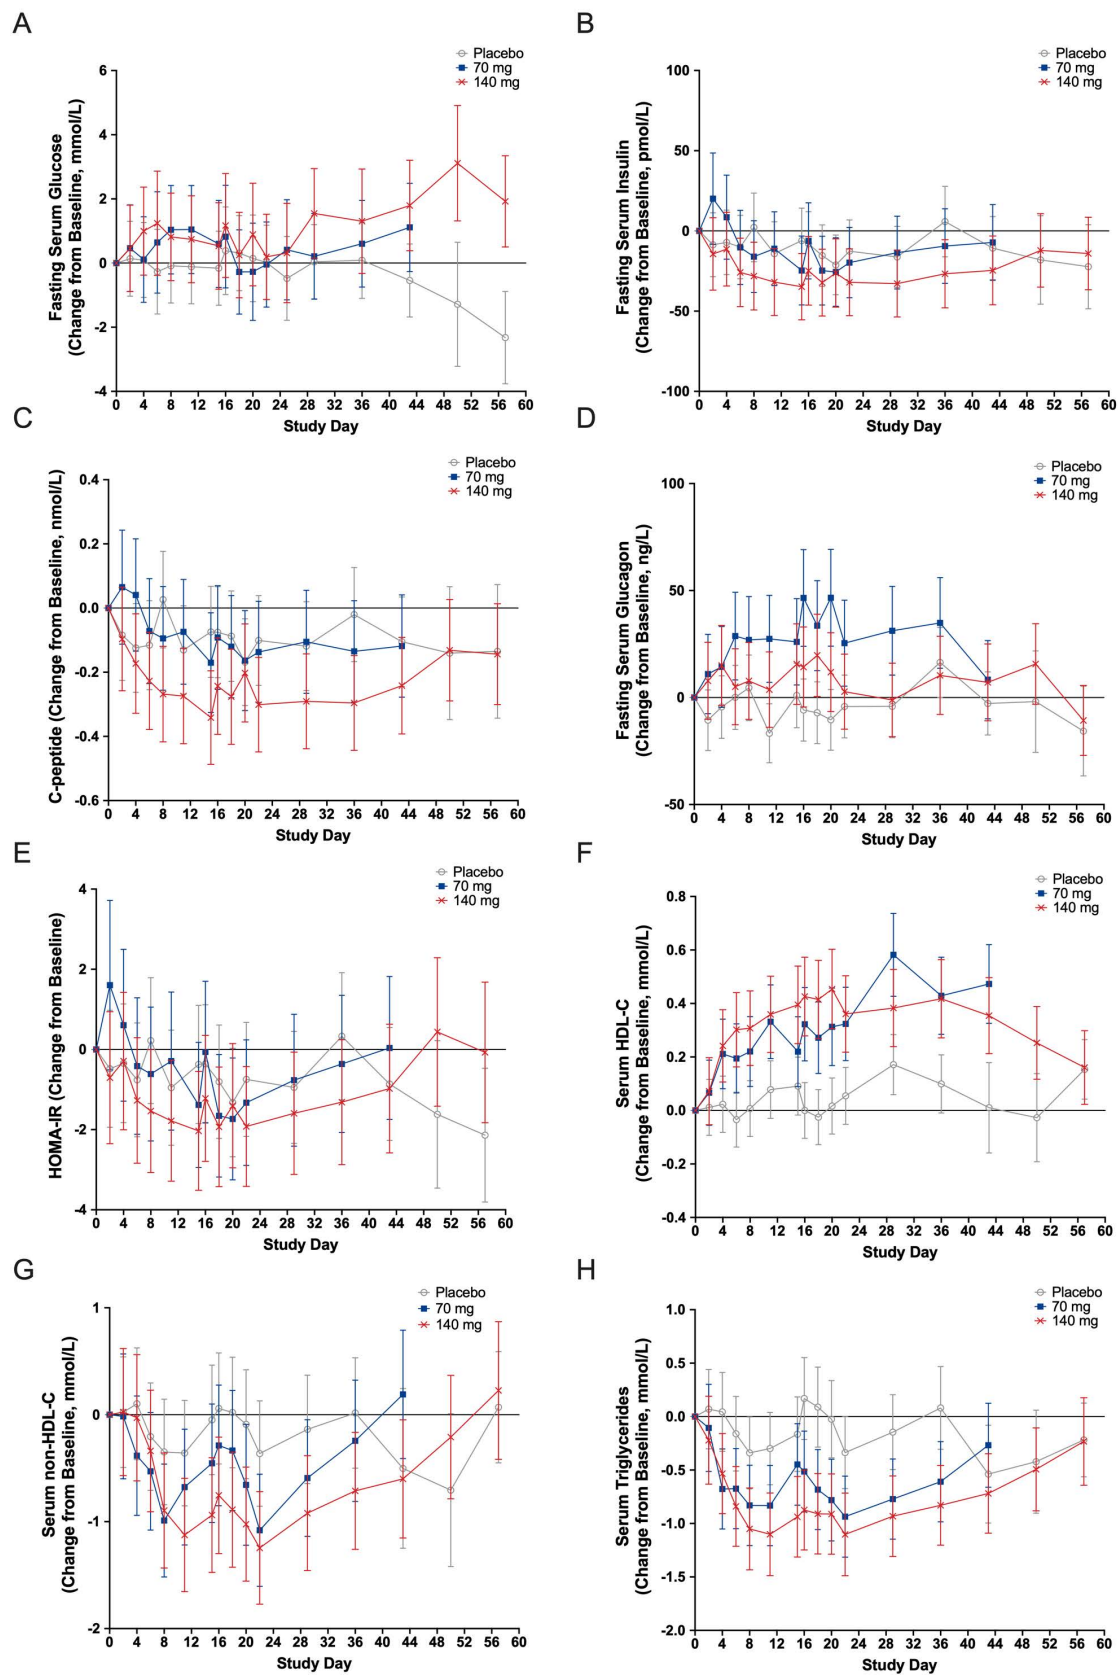

Figure S2. Effect of AKR-001 on markers of glycemic control and lipid metabolism. Related to Figure 3.

Concentration change from baseline of fasted state (A) glucose, (B) insulin, (C) C-peptide, (D) glucagon, (E) HOMA-IR, (F) HDL-cholesterol, (G) non-HDL-cholesterol, (H) triglycerides by study day for placebo (N=8), 70 mg (N=6), and 140 mg (N=6) Q2W dose cohorts. Data are presented as least-squares mean  $\pm$  95% confidence interval

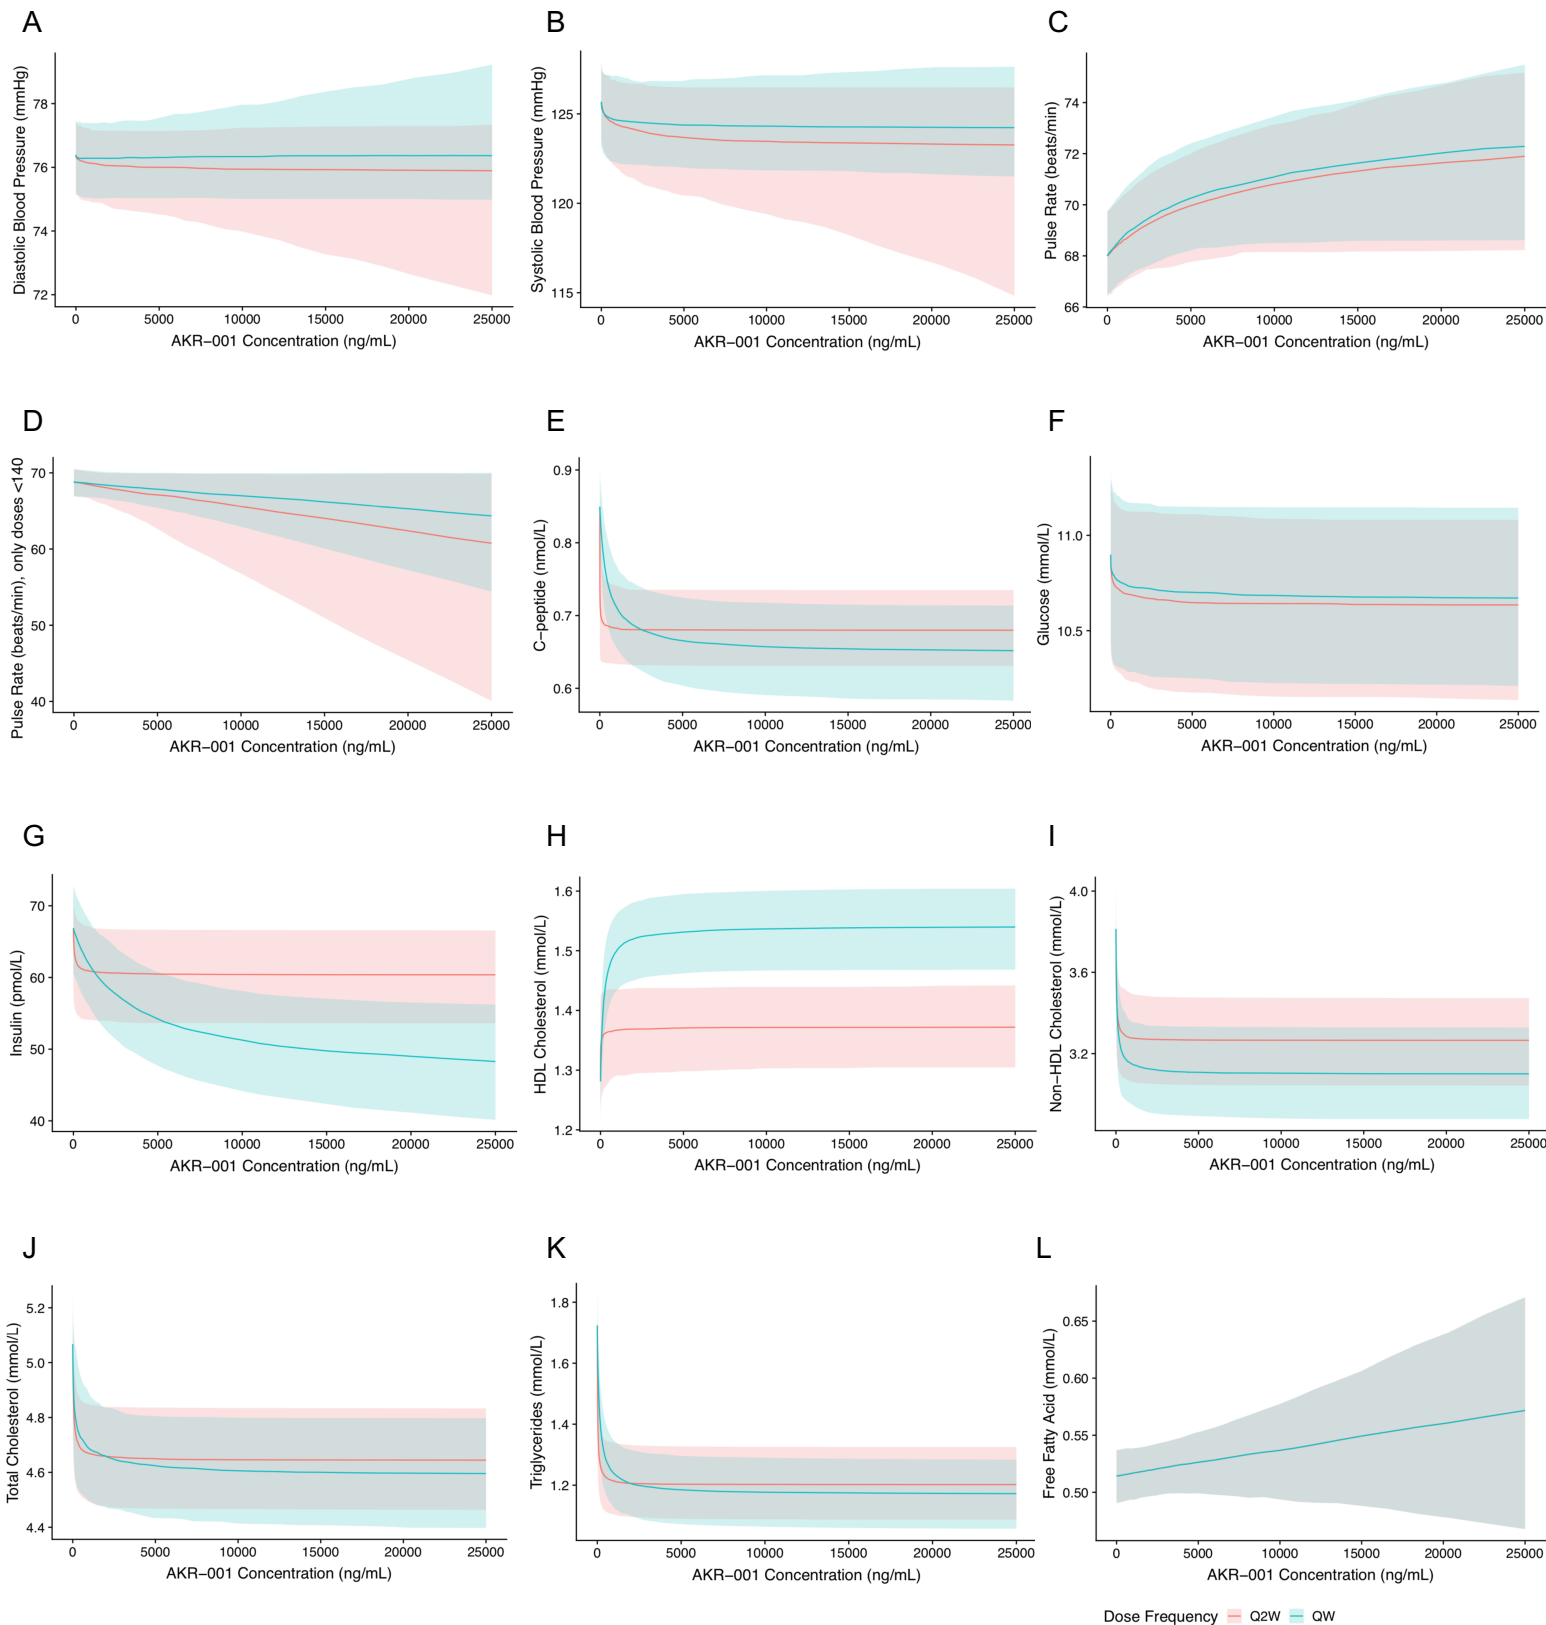

Figure S3. Model-predicted effect of AKR-001 on cardiovascular parameters and markers of glycemic control and lipid metabolism after overnight fast. Related to Table 3.

Model-predicted (A) diastolic blood pressure, (B) systolic blood pressure, (C) pulse rate across all dose groups, (D) pulse rate across 7–70 mg dose groups only, (E) C-peptide, (F) glucose, (G) insulin, (H) HDL-C, (I) non-HDL-C, (J) total cholesterol, (K) triglyceride, (L) free fatty acid, over the range of serum concentrations of AKR-001 at all timepoint measured following administration of 7–140 mg QW and Q2W doses. Shading indicates 95% confidence interval. Blue lines and shading correspond to QW dose groups, red lines and shading correspond to Q2W dose groups.

Table S1. Least-squares mean (95% confidence interval) placebo-corrected percentage change from baseline AUC<sub>0-4hr</sub> of metabolic markers following a mixed meal tolerance test (MMTT) on Day 18 (Q2W groups) or Day 25 (QW groups). Related to Table 3.

| Treatment group | AKR-001 QW    |                |                |                | AKR-001 Q2W   |                |                |                 |
|-----------------|---------------|----------------|----------------|----------------|---------------|----------------|----------------|-----------------|
|                 | 7 mg<br>(N=7) | 21 mg<br>(N=6) | 70 mg<br>(N=6) | 140mg<br>(N=5) | 7 mg<br>(N=6) | 21 mg<br>(N=6) | 70 mg<br>(N=6) | 140 mg<br>(N=6) |
| Glucose         | -3 (-20, 18)  | 6 (-13, 28)    | -29 (-42, -14) | -30 (-42, -15) | -6 (-23, 15)  | 14 (-7, 39)    | -10 (-26, 10)  | -6 (-23, 14)    |
| Insulin         | -28 (-44, -8) | -26 (-43, -6)  | -24 (-41, -3)  | -49 (-60, -35) | -14 (-33, 11) | 0 (-22, 29)    | -23 (-40, -1)  | -28 (-44, -7)   |
| C-peptide       | -14 (-27, 1)  | -17 (-30, -3)  | -15 (-28, 0)   | -37 (-46, -26) | 2 (-13, 21)   | 6 (-11, 25)    | -7 (-22, 9)    | -17 (-30, -2)   |
| Glucagon        | 34 (14, 58)   | 3 (-13, 22)    | 11 (-6, 32)    | 22 (3, 44)     | 12 (-6, 32)   | -10 (-24, 7)   | 32 (11, 57)    | 4 (-13, 23)     |
| FFA             | 2 (-23, 36)   | -10 (-33, 20)  | -31 (-49, -8)  | -19 (-39, 7)   | -18 (-39, 10) | 21 (-10, 62)   | -4 (-28, 29)   | 31 (-3, 75)     |

AUC<sub>0-4hr</sub>, area under the concentration-time curve in the four hours post-MMTT; QW, once weekly; Q2W, once every two weeks; N, number of subjects per group; FFA, free fatty acids

Table S2. Least-squares mean (95% confidence interval) placebo-corrected percentage change from baseline of *post hoc* biomarkers on Day 29. Related to Table 3.

| Treatment group | QW            |                |                |                | Q2W           |                |                |                 |
|-----------------|---------------|----------------|----------------|----------------|---------------|----------------|----------------|-----------------|
|                 | 7 mg<br>(N=6) | 21 mg<br>(N=6) | 70 mg<br>(N=6) | 140mg<br>(N=5) | 7 mg<br>(N=6) | 21 mg<br>(N=6) | 70 mg<br>(N=6) | 140 mg<br>(N=6) |
| Adiponectin     | 42 (-13, 131) | 62 (-3, 172)   | 94 (18, 220)   | 143 (48, 300)  | 60 (-3, 165)  | 73 (5, 187)    | 65 (0, 174)    | 141 (45, 298)   |
| apoA-1          | 21 (5, 39)    | 15 (0, 33)     | -7 (-20, 7)    | 16 (0, 33)     | -6 (-19, 10)  | 0 (-14, 16)    | 16 (0, 35)     | ND              |
| apoB            | 0 (-19, 23)   | -16 (-32, 4)   | -42 (-53, -28) | -18 (-34, 1)   | -12 (-30, 10) | -15 (-32, 6)   | -11 (-29, 11)  | ND              |
| IGF-1           | 26 (-3, 63)   | 30 (0, 70)     | 31 (1, 70)     | 24 (-4, 61)    | 13 (-13, 48)  | 7 (-18, 40)    | 35 (3, 75)     | -2 (-25, 29)    |
| FGF19           | -30 (-71, 69) | 7 (-56, 164)   | -8 (-63, 126)  | 29 (-47, 214)  | -61 (-84, -3) | -43 (-77, 41)  | -67 (-87, -19) | -75 (-90, -37)  |
| C4              | 276 (69, 737) | 54 (-32, 248)  | 36 (-40, 206)  | 47 (-34, 230)  | 123 (2, 406)  | 72 (-24, 291)  | 116 (-5, 391)  | 56 (-31, 255)   |
| ANGPTL4         | -18 (-36, 4)  | -30 (-45, -11) | -13 (-32, 11)  | -9 (-29, 16)   | ND            | ND             | ND             | ND              |
| apoC-2          | -48 (-73, -3) | -54 (-75, -14) | -55 (-76, -14) | -56 (-76, -17) | ND            | ND             | ND             | ND              |
| apoC-3          | -24 (-49, 14) | -24 (-50, 13)  | -46 (-64, -19) | -46 (-64, -19) | ND            | ND             | ND             | ND              |
| Lp(a)           | -4 (-30, 33)  | -1 (-29, 37)   | 9 (-22, 50)    | 11 (-20, 54)   | ND            | ND             | ND             | ND              |

QW, once weekly; Q2W, once every two weeks; N, number of subjects per group; apoA-1, apolipoprotein A; apoB, apolipoprotein B; ND, not determined (insufficient sample numbers); IGF-1, insulin-like growth factor 1; FGF19, Fibroblast Growth Factor-19; C4, 7 $\alpha$ -hydroxy-4-cholesten-3-one; ANGPTL4, Angiotensin-like 4; apoC-2, apolipoprotein C-2; apoC-3, apolipoprotein C-3; Lp(a), Lipoprotein(a)

Table S3. Least-squares mean (95% confidence interval) change from baseline of blood pressure (BP) and pulse rate on Day 18 (Q2W groups) or Day 25 (QW groups). Related to Table 4.

| Treatment group     | QW               |               |                |                |                | Q2W              |               |                |                |                 |
|---------------------|------------------|---------------|----------------|----------------|----------------|------------------|---------------|----------------|----------------|-----------------|
|                     | Placebo<br>(N=8) | 7 mg<br>(N=6) | 21 mg<br>(N=6) | 70 mg<br>(N=6) | 140mg<br>(N=5) | Placebo<br>(N=8) | 7 mg<br>(N=6) | 21 mg<br>(N=6) | 70 mg<br>(N=6) | 140 mg<br>(N=6) |
| Systolic BP, mm Hg  | -7 (-15, 1)      | -3 (-12, 7)   | 4 (-6, 13)     | -8 (-18, 1)    | 3 (-7, 12)     | 0 (-9, 8)        | 0 (-10, 10)   | -2 (-11, 8)    | -4 (-14, 6)    | 0 (-10, 10)     |
| Diastolic BP, mm Hg | -2 (-7, 2)       | -1 (-6, 5)    | -2 (-7, 4)     | -6 (-12, -1)   | 1 (-4, 7)      | 0 (-5, 4)        | 0 (-6, 5)     | 4 (-2, 10)     | -2 (-7, 4)     | 3 (-3, 8)       |
| Pulse rate, bpm     | 5 (0, 10)        | 4 (-1, 10)    | 5 (0, 11)      | 1 (-4, 7)      | 7 (2, 13)      | -1 (-6, 4)       | 5 (-1, 11)    | 1 (-4, 7)      | 5 (0, 10)      | 13 (7, 19)      |

QW, once weekly; Q2W, once every two weeks; N, number of subjects per group; mm Hg, millimeters mercury; bpm, beats per minute



Table S4. Treatment-emergent adverse events by Preferred Term reported in no more than 1 subject in both pooled placebo and pooled all-dose AKR-001 (7–140 mg, QW and Q2W) treatment group. Related to Table 3.

| Subjects reporting TEAEs*, n(%) | Placebo<br>QW/Q2W | AKR-001 QW    |                |                |                 | AKR-001 Q2W   |                |                |                 | AKR-001 Pooled<br>QW/Q2W |                    |
|---------------------------------|-------------------|---------------|----------------|----------------|-----------------|---------------|----------------|----------------|-----------------|--------------------------|--------------------|
|                                 | (N=17)            | 7 mg<br>(N=7) | 21 mg<br>(N=6) | 70 mg<br>(N=6) | 140 mg<br>(N=9) | 7 mg<br>(N=6) | 21 mg<br>(N=6) | 70 mg<br>(N=6) | 140 mg<br>(N=6) | ≤70 mg<br>(N=37)         | 7–140 mg<br>(N=52) |
| Abdominal distension            | 0 (0)             | 0 (0)         | 0 (0)          | 0 (0)          | 1 (11.1)        | 0 (0)         | 0 (0)          | 0 (0)          | 0 (0)           | 0 (0)                    | 1 (1.9)            |
| Abdominal pain                  | 0 (0)             | 0 (0)         | 0 (0)          | 0 (0)          | 0 (0)           | 1 (16.7)      | 0 (0)          | 0 (0)          | 0 (0)           | 1 (2.7)                  | 1 (1.9)            |
| Abdominal tenderness            | 0 (0)             | 0 (0)         | 0 (0)          | 0 (0)          | 1 (11.1)        | 0 (0)         | 0 (0)          | 0 (0)          | 0 (0)           | 0 (0)                    | 1 (1.9)            |
| Anxiety                         | 0 (0)             | 0 (0)         | 0 (0)          | 1 (16.7)       | 0 (0)           | 0 (0)         | 0 (0)          | 0 (0)          | 0 (0)           | 1 (2.7)                  | 1 (1.9)            |
| Cardiac murmur                  | 0 (0)             | 0 (0)         | 0 (0)          | 0 (0)          | 0 (0)           | 0 (0)         | 0 (0)          | 1 (16.7)       | 0 (0)           | 1 (2.7)                  | 1 (1.9)            |
| Chest pain                      | 0 (0)             | 0 (0)         | 0 (0)          | 1 (16.7)       | 0 (0)           | 0 (0)         | 0 (0)          | 0 (0)          | 0 (0)           | 1 (2.7)                  | 1 (1.9)            |
| Chills                          | 0 (0)             | 0 (0)         | 0 (0)          | 0 (0)          | 0 (0)           | 0 (0)         | 0 (0)          | 1 (16.7)       | 0 (0)           | 1 (2.7)                  | 1 (1.9)            |
| Cyst                            | 0 (0)             | 1 (14.3)      | 0 (0)          | 0 (0)          | 0 (0)           | 0 (0)         | 0 (0)          | 0 (0)          | 0 (0)           | 1 (2.7)                  | 1 (1.9)            |
| Decreased appetite              | 0 (0)             | 0 (0)         | 0 (0)          | 0 (0)          | 1 (11.1)        | 0 (0)         | 0 (0)          | 0 (0)          | 0 (0)           | 0 (0)                    | 1 (1.9)            |
| Dermatitis contact              | 1 (5.9)           | 0 (0)         | 0 (0)          | 0 (0)          | 0 (0)           | 0 (0)         | 0 (0)          | 0 (0)          | 1 (16.7)        | 0 (0)                    | 1 (1.9)            |
| Dizziness                       | 0 (0)             | 0 (0)         | 0 (0)          | 0 (0)          | 1 (11.1)        | 0 (0)         | 0 (0)          | 0 (0)          | 0 (0)           | 0 (0)                    | 1 (1.9)            |
| Epigastric discomfort           | 0 (0)             | 0 (0)         | 1 (16.7)       | 0 (0)          | 0 (0.0)         | 0 (0)         | 0 (0)          | 0 (0)          | 0 (0)           | 1 (2.7)                  | 1 (1.9)            |
| Epistaxis                       | 0 (0)             | 0 (0)         | 0 (0)          | 0 (0)          | 1 (11.1)        | 0 (0)         | 0 (0)          | 0 (0)          | 0 (0)           | 0 (0)                    | 1 (1.9)            |
| Eye irritation                  | 0 (0)             | 0 (0)         | 0 (0)          | 0 (0)          | 0 (0)           | 0 (0)         | 1 (16.7)       | 0 (0)          | 0 (0)           | 1 (2.7)                  | 1 (1.9)            |
| Flushing                        | 0 (0)             | 0 (0)         | 0 (0)          | 0 (0)          | 0 (0)           | 0 (0)         | 1 (16.7)       | 0 (0)          | 0 (0)           | 1 (2.7)                  | 1 (1.9)            |
| Hot flush                       | 0 (0)             | 0 (0)         | 0 (0)          | 1 (16.7)       | 0 (0)           | 0 (0)         | 0 (0)          | 0 (0)          | 0 (0)           | 1 (2.7)                  | 1 (1.9)            |
| Hunger                          | 0 (0)             | 0 (0)         | 0 (0)          | 0 (0)          | 0 (0)           | 0 (0)         | 1 (16.7)       | 0 (0)          | 0 (0)           | 1 (2.7)                  | 1 (1.9)            |
| Hyperglycemia                   | 1 (5.9)           | 1 (14.3)      | 0 (0)          | 0 (0)          | 0 (0)           | 0 (0)         | 0 (0)          | 0 (0)          | 0 (0)           | 1 (2.7)                  | 1 (1.9)            |
| Hyperhidrosis                   | 0 (0)             | 0 (0)         | 0 (0)          | 0 (0)          | 1 (11.1)        | 0 (0)         | 0 (0)          | 0 (0)          | 0 (0)           | 0 (0)                    | 1 (1.9)            |
| Hypoglycemia                    | 0 (0)             | 0 (0)         | 1 (16.7)       | 0 (0)          | 0 (0)           | 0 (0)         | 0 (0)          | 0 (0)          | 0 (0)           | 1 (2.7)                  | 1 (1.9)            |
| Influenza-like illness          | 0 (0)             | 0 (0)         | 0 (0)          | 0 (0)          | 0 (0)           | 0 (0)         | 0 (0)          | 0 (0)          | 1 (16.7)        | 0 (0)                    | 1 (1.9)            |
| Injection site bruising         | 0 (0)             | 0 (0)         | 0 (0)          | 0 (0)          | 1 (11.1)        | 0 (0)         | 0 (0)          | 0 (0)          | 0 (0)           | 0 (0)                    | 1 (1.9)            |
| Insomnia                        | 0 (0)             | 0 (0)         | 0 (0)          | 0 (0)          | 0 (0)           | 0 (0)         | 0 (0)          | 1 (16.7)       | 0 (0)           | 1 (2.7)                  | 1 (1.9)            |
| Musculoskeletal pain            | 0 (0)             | 0 (0)         | 0 (0)          | 0 (0)          | 0 (0)           | 1 (16.7)      | 0 (0)          | 0 (0)          | 0 (0)           | 1 (2.7)                  | 1 (1.9)            |
| Nephrolithiasis                 | 0 (0)             | 0 (0)         | 0 (0)          | 0 (0)          | 0 (0)           | 0 (0)         | 0 (0)          | 1 (16.7)       | 0 (0)           | 1 (2.7)                  | 1 (1.9)            |
| Non-cardiac chest pain          | 0 (0)             | 0 (0)         | 0 (0)          | 1 (16.7)       | 0 (0)           | 0 (0)         | 0 (0)          | 0 (0)          | 0 (0)           | 1 (2.7)                  | 1 (1.9)            |

|                                         |         |          |          |       |          |          |       |          |          |         |         |
|-----------------------------------------|---------|----------|----------|-------|----------|----------|-------|----------|----------|---------|---------|
| Oropharyngeal pain                      | 0 (0)   | 0 (0)    | 1 (16.7) | 0 (0) | 0 (0)    | 0 (0)    | 0 (0) | 0 (0)    | 0 (0)    | 1 (2.7) | 1 (1.9) |
| Pain                                    | 0 (0)   | 1 (14.3) | 0 (0)    | 0 (0) | 0 (0)    | 0 (0)    | 0 (0) | 0 (0)    | 0 (0)    | 1 (2.7) | 1 (1.9) |
| Parotid gland enlargement               | 0 (0)   | 0 (0)    | 0 (0)    | 0 (0) | 0 (0)    | 0 (0)    | 0 (0) | 1 (16.7) | 0 (0)    | 1 (2.7) | 1 (1.9) |
| Pruritis                                | 0 (0)   | 0 (0)    | 0 (0)    | 0 (0) | 0 (0)    | 1 (16.7) | 0 (0) | 0 (0)    | 0 (0)    | 1 (2.7) | 1 (1.9) |
| Rash                                    | 0 (0)   | 0 (0)    | 0 (0)    | 0 (0) | 0 (0)    | 0 (0)    | 0 (0) | 1 (16.7) | 0 (0)    | 1 (2.7) | 1 (1.9) |
| Sinus headache                          | 0 (0)   | 1 (16.7) | 0 (0)    | 0 (0) | 0 (0)    | 0 (0)    | 0 (0) | 0 (0)    | 0 (0)    | 1 (2.7) | 1 (1.9) |
| Tachycardia                             | 0 (0)   | 0 (0)    | 0 (0)    | 0 (0) | 0 (0)    | 0 (0)    | 0 (0) | 0 (0)    | 1 (16.7) | 0 (0.0) | 1 (1.9) |
| Toothache                               | 0 (0)   | 1 (14.3) | 0 (0)    | 0 (0) | 0 (0)    | 0 (0)    | 0 (0) | 0 (0)    | 0 (0)    | 1 (2.7) | 1 (1.9) |
| Urine output increased                  | 0 (0)   | 0 (0)    | 0 (0)    | 0 (0) | 0 (0)    | 0 (0)    | 0 (0) | 1 (16.7) | 0 (0)    | 1 (2.7) | 1 (1.9) |
| Ventricular extrasystoles               | 0 (0)   | 0 (0)    | 0 (0)    | 0 (0) | 1 (11.1) | 0 (0)    | 0 (0) | 0 (0)    | 0 (0)    | 0 (0)   | 1 (1.9) |
| Viral upper respiratory tract infection | 1 (5.9) | 0 (0)    | 0 (0)    | 0 (0) | 0 (0)    | 0 (0)    | 0 (0) | 0 (0)    | 1 (16.7) | 0 (0)   | 1 (1.9) |
| Cough                                   | 1 (5.9) | 0 (0)    | 0 (0)    | 0 (0) | 0 (0)    | 0 (0)    | 0 (0) | 0 (0)    | 0 (0)    | 0 (0)   | 0 (0)   |
| Dermal cyst                             | 1 (5.9) | 0 (0)    | 0 (0)    | 0 (0) | 0 (0)    | 0 (0)    | 0 (0) | 0 (0)    | 0 (0)    | 0 (0)   | 0 (0)   |
| Dysesthesia                             | 1 (5.9) | 0 (0)    | 0 (0)    | 0 (0) | 0 (0)    | 0 (0)    | 0 (0) | 0 (0)    | 0 (0)    | 0 (0)   | 0 (0)   |
| Injection site discoloration            | 1 (5.9) | 0 (0)    | 0 (0)    | 0 (0) | 0 (0)    | 0 (0)    | 0 (0) | 0 (0)    | 0 (0)    | 0 (0)   | 0 (0)   |
| Injection site hemorrhage               | 1 (5.9) | 0 (0)    | 0 (0)    | 0 (0) | 0 (0)    | 0 (0)    | 0 (0) | 0 (0)    | 0 (0)    | 0 (0)   | 0 (0)   |
| Myalgia                                 | 1 (5.9) | 0 (0)    | 0 (0)    | 0 (0) | 0 (0)    | 0 (0)    | 0 (0) | 0 (0)    | 0 (0)    | 0 (0)   | 0 (0)   |
| Oral herpes                             | 1 (5.9) | 0 (0)    | 0 (0)    | 0 (0) | 0 (0)    | 0 (0)    | 0 (0) | 0 (0)    | 0 (0)    | 0 (0)   | 0 (0)   |
| Vertigo positional                      | 1 (5.9) | 0 (0)    | 0 (0)    | 0 (0) | 0 (0)    | 0 (0)    | 0 (0) | 0 (0)    | 0 (0)    | 0 (0)   | 0 (0)   |

\*TEAE by Preferred Term. Coded using Medical Dictionary for Regulatory Activities version 17.0

QW, once weekly; Q2W, once every two weeks; N, number of subjects per group; TEAEs, treatment-emergent adverse events

Table S5. Cross-trial comparison of multiple-dose clinical data of endocrine FGF analogs or mimetics. Related to Figure 2.

|                                        |                                                   |                                                                |                                                            |                                                           |                                                                     |                                                          |
|----------------------------------------|---------------------------------------------------|----------------------------------------------------------------|------------------------------------------------------------|-----------------------------------------------------------|---------------------------------------------------------------------|----------------------------------------------------------|
| Placebo-corrected change from baseline | AKR-001<br>4 weeks<br>T2D<br>70mg QW<br>Ph1b, n=6 | PF-05231023<br>25 days<br>obese T2D<br>100mg BIW<br>Ph1b, n=10 | LY2405319<br>4 weeks<br>obese T2D<br>20mg QD<br>Ph1b, n=13 | Pegbelfermin<br>16 weeks<br>NASH<br>20mg QW<br>Ph2a, n=24 | Aldafermin<br>12 weeks<br>NASH<br>1mg QD <sup>1</sup><br>Ph2a, n=27 | BFKB8488A<br>12 weeks<br>NAFLD<br>100mg Q2W<br>Ph1b, n=8 |
| Dose presented                         | Highest dose being tested in Ph2a                 | Lowest dose with max. effect                                   | Highest dose tested                                        | Dose selected for further development                     | Dose selected for further development                               | Highest dose tolerated in Ph1b                           |
| Current stage                          | Ph2a                                              | discontinued                                                   | discontinued                                               | Ph2b                                                      | Ph2b                                                                | Ph2b                                                     |
| Molecule                               | Fc-FGF21(RGE)                                     | IgG-FGF21                                                      | FGF21 variant, glycosylated                                | PEG-FGF21                                                 | FGF19 variant (+rosuvastatin)                                       | FGFR1c/KLB bispecific mAb                                |
| Molecular Weight                       | ~92 kDa                                           | ~190 kDa                                                       | ~20kDa                                                     | ~50 kDa                                                   | ~20 kDa                                                             | ~150 kDa                                                 |
| T1/2 (half-life)                       | 3-3.5 days                                        | 7.5-8.5 hours                                                  | Short (Dosed QD)                                           | 1.5-2 days                                                | Short (Dosed QD)                                                    | 3-10 days                                                |
| Body weight                            | No effect                                         | -4%                                                            | -1.5%                                                      | No effect                                                 | NR                                                                  | NR                                                       |
| Triglycerides                          | -69%                                              | -50%                                                           | -47%                                                       | -8%                                                       | -25%                                                                | -20%                                                     |
| HDL-C                                  | +61%                                              | +25%                                                           | +18%                                                       | +14%                                                      | 0                                                                   | +20%                                                     |
| Non-HDL-C                              | -30%                                              | NR                                                             | NR                                                         | NR                                                        | NR                                                                  | NR                                                       |
| LDL-C                                  | -13%                                              | -15%                                                           | -20%                                                       | -2%                                                       | +55%                                                                | NR                                                       |
| Apolipoprotein B                       | -42%                                              | NR                                                             | -27%                                                       | NR                                                        | NR                                                                  | NR                                                       |
| Apolipoprotein C3                      | -46%                                              | NR                                                             | -33%                                                       | NR                                                        | NR                                                                  | NR                                                       |
| Fasting Insulin                        | -49%                                              | -5%                                                            | -36%                                                       | NR                                                        | NR                                                                  | NR                                                       |
| Fasting Glucose                        | -23%                                              | -5%                                                            | -8%                                                        | NR                                                        | NR                                                                  | NR                                                       |
| Adiponectin                            | +94%                                              | +2000%                                                         | +72%                                                       | +19.2%                                                    | NR                                                                  | +30%                                                     |
| LFC, rel. reduction                    | NR                                                | NR                                                             | NR                                                         | -20%                                                      | -57%                                                                | -35%                                                     |
| Heart Rate                             | No effect                                         | Increased                                                      | NR                                                         | No effect                                                 | NR                                                                  | NR                                                       |
| Blood Pressure                         | No effect                                         | Increased                                                      | NR                                                         | No effect                                                 | NR                                                                  | NR                                                       |
| Bone turnover                          | No effect                                         | Increased                                                      | NR                                                         | No effect                                                 | NR                                                                  | NR                                                       |
| Adverse events                         | Diarrhea, Nausea                                  | Increased HR, BP                                               | Hypersensitivity                                           | Diarrhea, Nausea                                          | Diarrhea, Nausea                                                    | Nausea, Diarrhea                                         |
| Source                                 | Present study                                     | Talukdar <i>et al.</i> , 2016<br>Kim <i>et al.</i> , 2017      | Gaich <i>et al.</i> , 2013                                 | Sanyal <i>et al.</i> , 2019                               | Harrison <i>et al.</i> , 2018<br>AASLD                              | Kunder <i>et al.</i> , 2019<br>AASLD                     |

<sup>1</sup> aldafermin 1 mg data is not corrected for placebo, as the trial did not contain a placebo control arm.

T2D, type 2 diabetes; NASH, non-alcoholic steatohepatitis; NAFLD, non-alcoholic fatty liver disease; QW, once weekly; QD, once daily; BIW, twice weekly; Q2W, once every two weeks; HDL-C, high-density lipoprotein cholesterol; LDL-C, low-density lipoprotein cholesterol; LFC, liver fat content; NR, not reported. Data are based on cross-trial comparisons with different populations, study duration, and trial design in the absence of head-to-head trials.
